# Supplementary material
Source: Springer Nature journal article supplement (https://www.springermedizin.de/resource/supplementary/13223_2014_508_MOESM2_ESM.docx/9596678)
Supplement: MOESM2 [file 9596678]

Table 1. Baseline Clinical Characteristics

| Clinical Characteristic | Ketotifen group | Placebo group |
| --- | --- | --- |
| Number | 4 | 2 |
| Median Age (years) | 10 | 10 |
| Sex | 1 female, 3 male | 1 female, 1 male |
| History of asthma | 2/4 | 1/2 |
| History of allergic rhinitis | 1/4 | 0/2 |
| History of atopic dermatitis | 2/4 | 0/2 |
| History of other food allergy | 1/4 | 1/2 |
| Initial median size (mm) of peanut skin prick test, (range) | 10 (7-16) | 15 (15) |
| Initial median peanut specific IgE (kUA/L), (range) | >100 kU/L (44.9 - >100) | >100 kU/L (>100) |
